# Supplementary material for: Exploring the Properties and Potential Uses of Biocarbon from Spent Coffee Grounds: A Comparative Look at Dry and Wet Processing Methods
Source: MDPI journal article supplement (doi:10.3390/pr11072099), 2023-07-13
Supplement: s1 [file s1]

## Supplemental Materials

### Exploring the Properties and Potential Uses of Biocarbon from Spent Coffee Grounds: A Comparative Look at Dry and Wet Processing Methods

Jie Yang<sup>1,2,a</sup>, Zeyuan Zhao<sup>1,2,a</sup>, Yulin Hu<sup>3</sup>, Lord Abbey<sup>4</sup>, Ivana Cesarino<sup>5</sup>, Ashantha Goonetilleke<sup>6,\*</sup>, Quan He<sup>4,\*</sup>

1 Institute of Oceanography, College of Geography and Oceanography, Minjiang University, Fuzhou 350108, China

2 Fujian Key Laboratory on Conservation and Sustainable Utilization of Marine Biodiversity, Minjiang University, Fuzhou 350108, China

3 Faculty of Sustainable Design Engineering, University of Prince Edward Island, Charlottetown, PEI, C1A 4P3, Canada

4 Faculty of Agriculture, Dalhousie University, Truro, Nova Scotia, B2N 5E3, Canada

5 School of Agricultural Sciences, Sao Paulo State University, São Paulo CEP 13566-590, Brazil

6 Science and Engineering Faculty, Queensland University of Technology (QUT), Brisbane, Queensland 4001, Australia

a These authors contributed to this work equally.

\* Correspondence: [quan.he@dal.ca](mailto:quan.he@dal.ca); [a.goonetilleke@qut.edu.au](mailto:a.goonetilleke@qut.edu.au)

(a) SCG

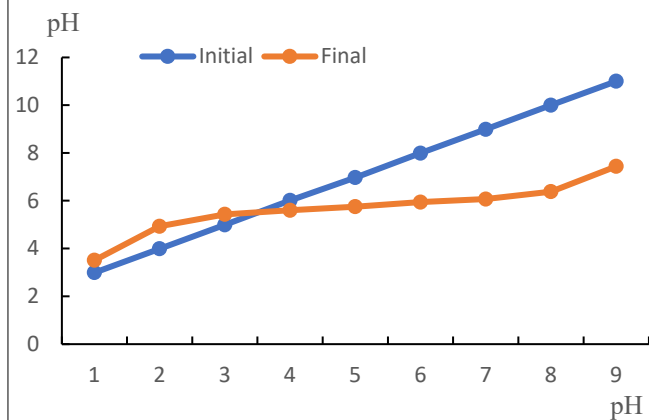

(b) Point of Zero Charge of SCG

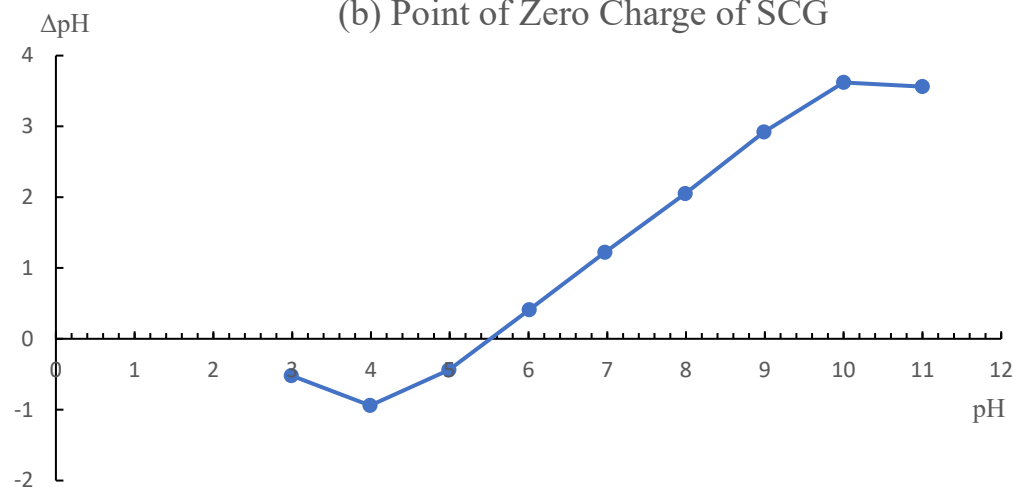

(c) Biochar-270°C

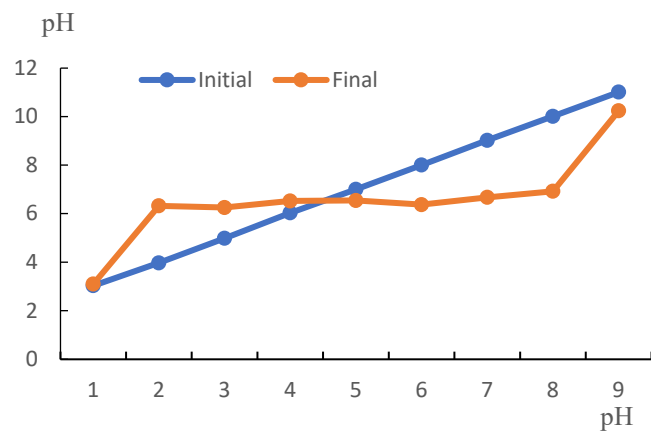

(d) Point of Zero Charge of Biochar-270°C

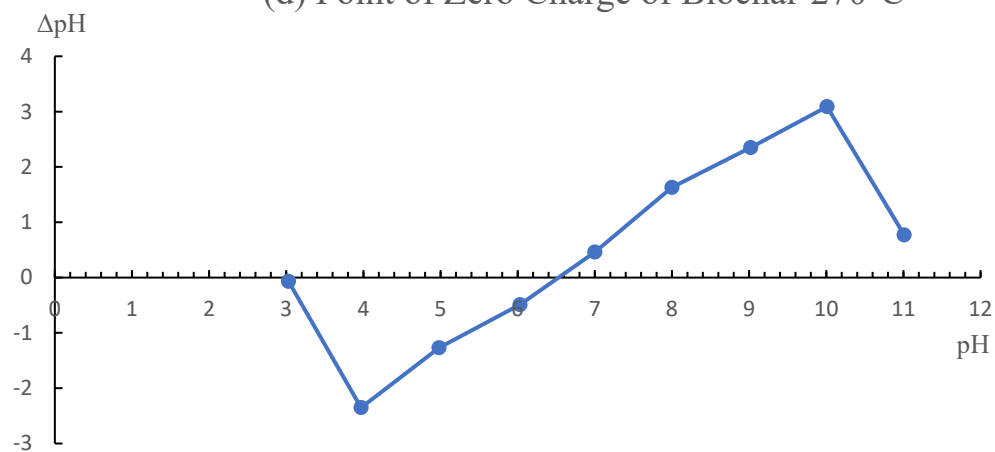

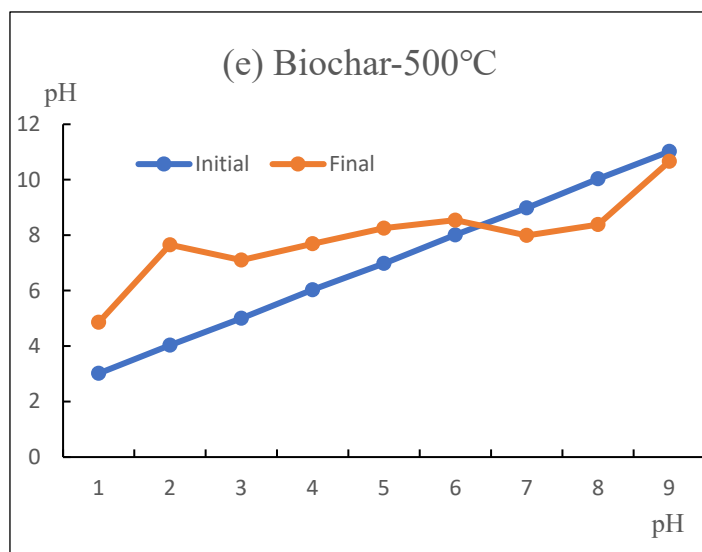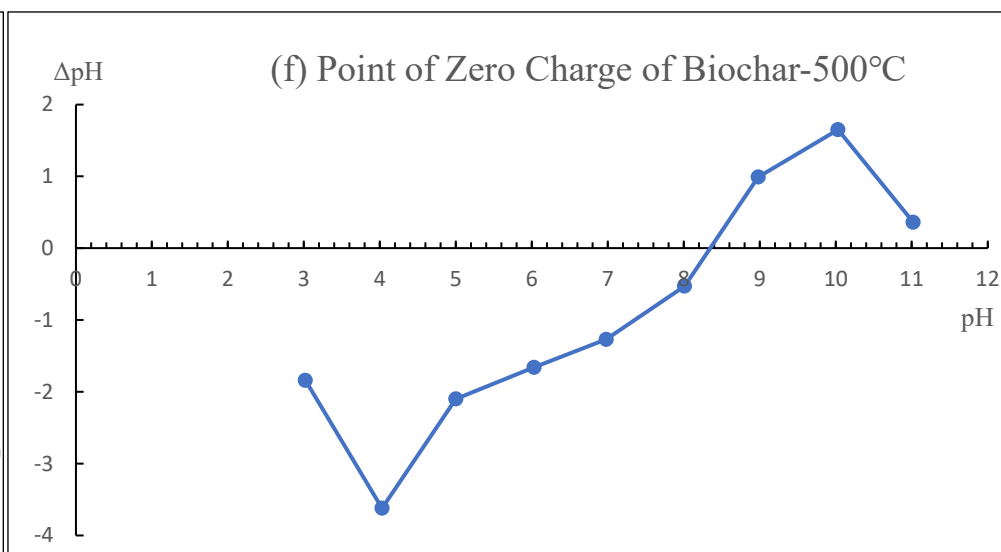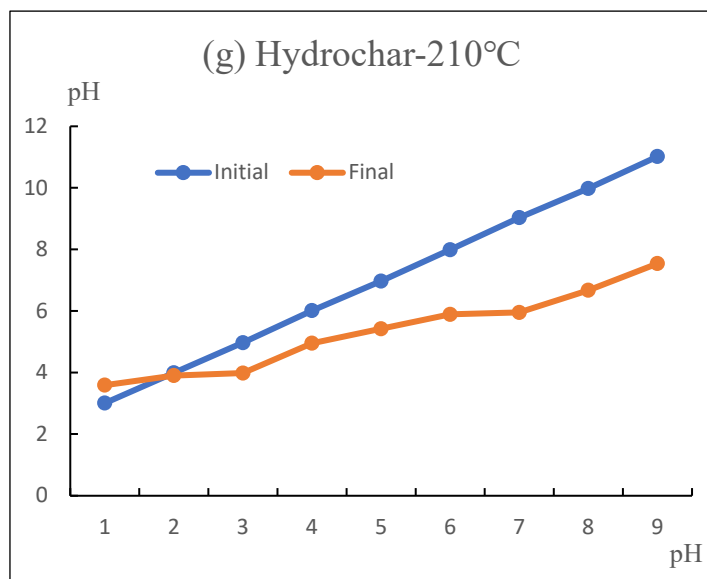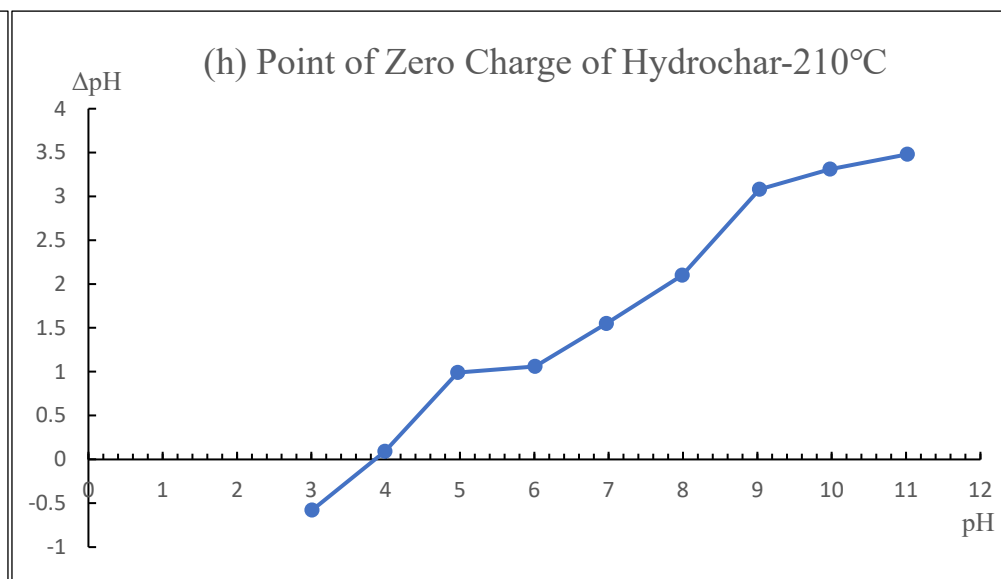

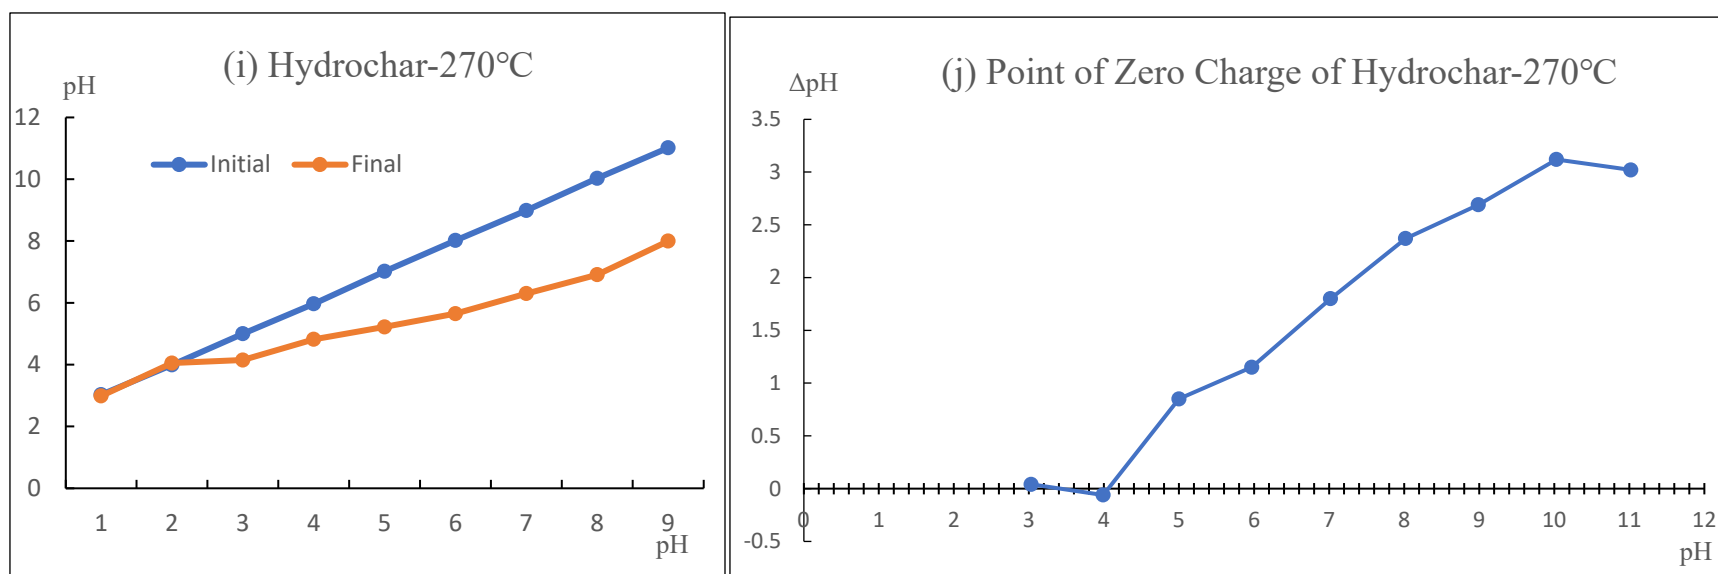

**Figure S1** Detailed information for the pH and pHpzc of the obtained biochars and hydrochars.

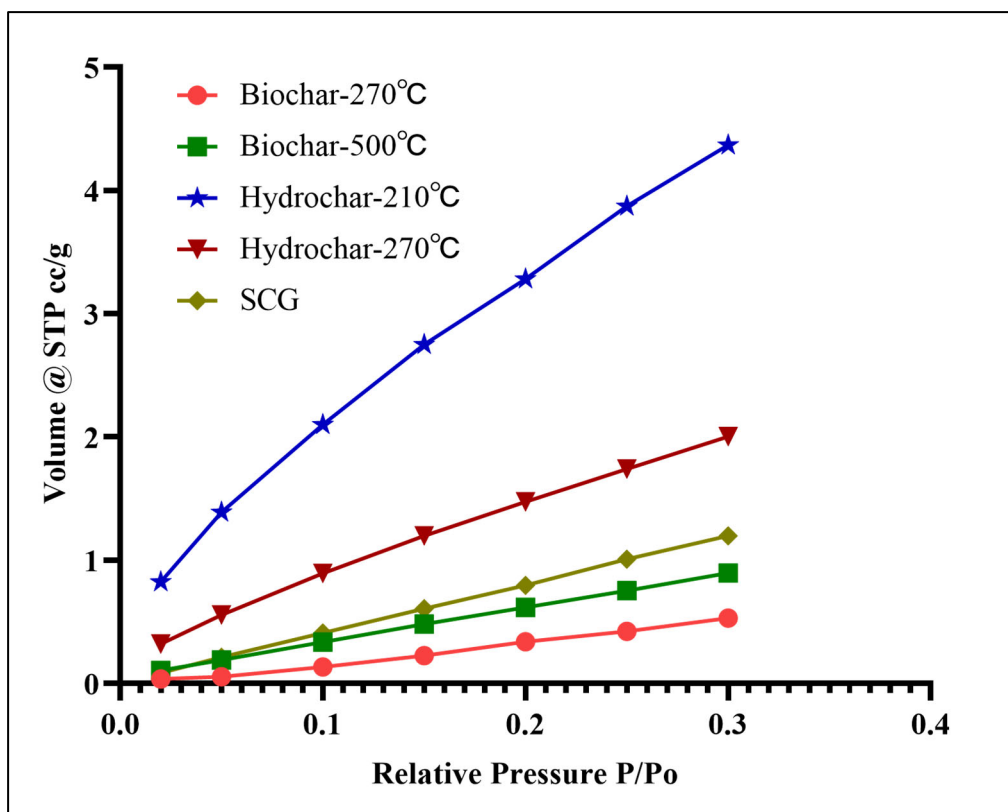

**Figure S2.** The relation between relative pressure and adsorbed volume for the obtained biochars and hydrochars from spent coffee grounds (SCG).
