# Supplementary material for: Exploring the Properties and Potential Uses of Biocarbon from Spent Coffee Grounds: A Comparative Look at Dry and Wet Processing Methods
Source: MDPI journal article supplement (doi:10.3390/pr11072099), 2023-07-13
Supplement: s1 [file s1]

Archive with 1 entries (1 files):
- processes-2463404-supplementary.pdf
